# Supplementary material for: “Click” synthesis of isomeric compounds for assessing the efficiency of the bifurcated Br⋯NO2synthon
Source: Royal Society of Chemistry journal article supplement (doi:10.1039/b809985e), 2008-12-16
Supplement: b809985e.pdf [file b809985e.pdf]

## “Click” Synthesis of Isomeric Compounds for Assessing the Efficiency of Bifurcated Br $\cdots$ NO $_2$ Synthons

C. V. Ramana,\* Soumitra Chatterjee, Kulbhushan A. Durugkar and Rajesh G. Gonnade\*

National Chemical Laboratory, Pune – 411008, India

E-mail: vr.chepuri@ncl.res.in

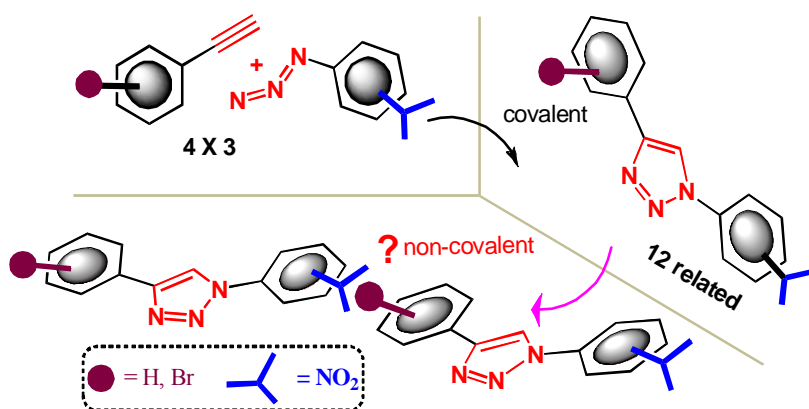

## Experimental

**General Methods:** All solvents were dried according to the standard methods prior to use. Commercial reagents were used without purification. Column chromatography was carried out by using Spectrochem silica gel (60–120 mesh).  $^1\text{H}$  and  $^{13}\text{C}$  NMR spectroscopy measurements were carried out on Bruker AC 200 MHz or Bruker DRX 400 MHz spectrometers, and TMS was used as internal standard.  $^1\text{H}$  and  $^{13}\text{C}$  NMR chemical shifts are reported in ppm downfield from tetramethylsilane and coupling constants ( $J$ ) are reported in hertz (Hz). The following abbreviations are used to designate signal multiplicity: s = singlet, d = doublet, t = triplet, q = quartet, m = multiplet, br = broad. Elemental analysis data were obtained on a Thermo Finnigan Flash EA 1112 Series CHNS Analyser.

### **General procedure for cycloaddition reactions with 2/4-nitrofluorobenzenes (2, 4):**

Fluoronitrobenzene (100 mg, 0.71 mmol) was mixed with bromophenylacetylene (128 mg, 0.71 mmol)/ phenyl acetylene (72 mg, 0.71 mmol) in 9:1 DMSO:H<sub>2</sub>O (10 mL). To the mixture were added L-proline (16 mg, 0.142 mmol), Na<sub>2</sub>CO<sub>3</sub> (15 mg, 0.142 mmol), NaN<sub>3</sub> (55 mg, 0.852 mmol), sodium ascorbate (14 mg, 0.071 mmol), and CuSO<sub>4</sub>·5H<sub>2</sub>O (9 mg, 0.036 mmol). The mixture was stirred for 24-48 h at 70 °C (bath temperature) and then the mixture was poured into 30 mL of ice-cold water. The solid residue was filtered and crystallized from appropriate solvent systems to procure white to yellow crystalline solids in (57-83%) yield.

### **General procedure for cycloaddition reactions with 3-azidobenzene (3):**

A mixture of 3-Azidonitrobenzene (116 mg, 0.71 mmol), bromophenylacetylene (128 mg, 0.71 mmol)/ phenyl acetylene (72 mg, 0.71 mmol) was taken in 9:1 DMSO:H<sub>2</sub>O (10 mL) in a round bottom flask and L-proline (16 mg, 0.142 mmol), Na<sub>2</sub>CO<sub>3</sub> (15 mg, 0.142 mmol), sodium ascorbate (14 mg, 0.071 mmol), and CuSO<sub>4</sub>·5H<sub>2</sub>O (9 mg, 0.036 mmol) were added to that mixture and the complete reaction mixture was heated at 70 °C (bath temperature) for 24 h with stirring. The reaction mixture was cooled to room temperature and diluted with 30 mL of water and combined water layer was thoroughly extracted with

ethyl acetate (3 x 50 mL). Organic layer was dried over sodium sulphate and concentrated under vacuum. The crude solid was purified by column chromatography over 230-400 silica using ethyl acetate-light petroleum (1:4) to obtain white to yellow solids (65-77%). This solid was crystallized from appropriate solvent system.

**1-(2-Nitrophenyl)-4-phenyl-1H-1,2,3-triazole (8, P2NPT):** MP: 140-141 °C.  $^1\text{H}$  NMR (200 MHz, DMSO- $d_6$ )  $\delta$  7.42-7.56 (m, 3H), 7.83-8.01 (m, 5H), 8.26 (dd,  $J = 1.1, 8.5$  Hz, 1H), 9.20 (s, 1H).  $^{13}\text{C}$  NMR (100 MHz,  $\text{CDCl}_3$ ). 120.8 (d), 125.6 (d), 126.0 (d), 127.9 (d), 128.7 (d), 129.0 (d), 129.8 (s), 130.4 (s), 130.6 (d), 133.7 (d). Anal. Calcd for  $\text{C}_{14}\text{H}_{10}\text{N}_4\text{O}_2$ : C, 63.15; H, 3.79; N, 21.04; O, 12.02; Found: C, 62.99; H, 3.67; N, 21.19.

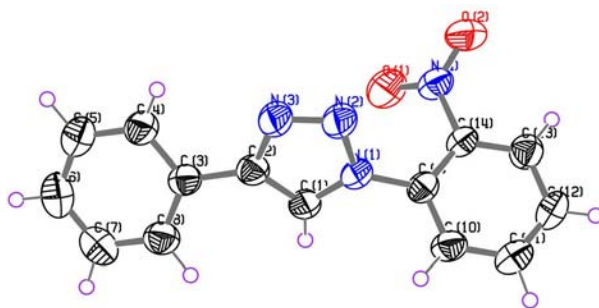

**Figure 1.** The molecular structure of compound 8

**4-(2-Bromophenyl)-1-(2-nitrophenyl)-1H-1,2,3-triazole (9, 2BP2NPT):** MP: 125 °C.  $^1\text{H}$  (400 MHz,  $\text{CDCl}_3$ )  $\delta$  7.24 (dt,  $J = 1.7, 7.8$  Hz, 1H), 7.46 (dt,  $J = 1.2, 7.8$  Hz, 1H), 7.68 (dd,  $J = 1.0, 8.1$  Hz, 1H), 7.73 (br. s, 1H), 7.75 (br. s, 1H), 7.83 (dt,  $J = 1.6, 8.1$  Hz, 1H), 8.12 (dd,  $J = 1.5, 8.2$  Hz, 1H), 8.24 (dd,  $J = 1.8, 7.8$  Hz, 1H), 8.56 (s, 1H).  $^{13}\text{C}$  (100 MHz,  $\text{CDCl}_3$ ) 121.3 (s), 124.3 (d), 125.7 (d), 127.4 (s), 127.8 (d), 128.1 (s), 129.7 (d), 130.7 (d), 130.9 (d), 133.7 (d), 142.0 (s), 145.9 (s). Anal. Calcd for  $\text{C}_{14}\text{H}_9\text{BrN}_4\text{O}_2$ : C, 48.72; H, 2.63; Br, 23.15; N, 16.23; Found: C, 48.98; H, 2.39; Br, 23.19; N, 16.51.

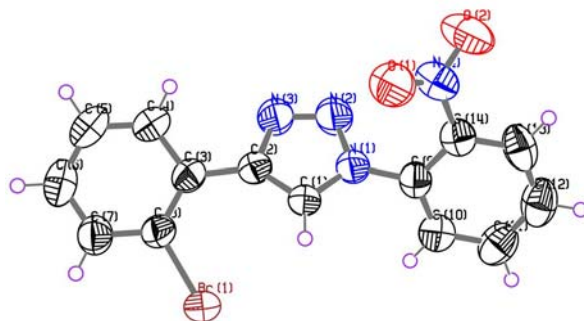

**Figure 2.** *The molecular structure of compound 9*

**4-(3-Bromophenyl)-1-(2-nitrophenyl)-1H-1,2,3-triazole (10, 3BP2NPT):** MP: 101 °C.  $^1\text{H}$  (400 MHz,  $\text{CDCl}_3$ )  $\delta$  7.02-7.44 (m, 3H), 7.58-7.82 (m, 4H), 7.94-8.04 (m, 2H).  $^{13}\text{C}$  (100 MHz,  $\text{CDCl}_3$ ) 121.4 (d), 123.1 (s), 124.5 (d), 125.7 (d), 126.9 (d), 127.90 (d), 129.0 (d), 130.5 (d), 130.8 (d), 131.5 (d), 131.8 (s), 133.8 (d), 144.4 (s), 146.9 (s). Anal. Calcd for  $\text{C}_{14}\text{H}_9\text{BrN}_4\text{O}_2$ : C, 48.72; H, 2.63; Br, 23.15; N, 16.23; Found: C, 48.76; H, 2.52; Br, 23.42; N, 16.11.

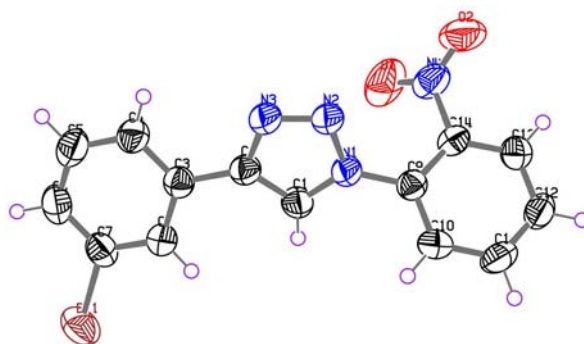

**Figure 3.** *The molecular structure of compound 10*

**4-(4-Bromophenyl)-1-(2-nitrophenyl)-1H-1,2,3-triazole (11, 4BP2NPT):** MP: 136-137 °C.  $^1\text{H}$  (400 MHz,  $\text{CDCl}_3$ )  $\delta$  7.40-7.50 (m, 1H), 7.57 (dt,  $J = 2.2, 8.7$  Hz, 1H), 7.65-7.88 (m, 5H), 8.06 (s, 1H), 8.06-8.22 (m, 1H).  $^{13}\text{C}$  (100 MHz,  $\text{CDCl}_3$ ) 121.0 (d), 122.7 (s), 125.6 (d), 127.5 (d), 127.9 (d), 129.8 (d), 130.8 (d), 132.2 (d), 132.4 (d), 133.8 (d), 144.4 (s), 147.4 (s). Anal. Calcd for  $\text{C}_{14}\text{H}_9\text{BrN}_4\text{O}_2$ : C, 48.72; H, 2.63; Br, 23.15; N, 16.23; Found: C, 48.44; H, 2.40; Br, 23.11; N, 16.41.

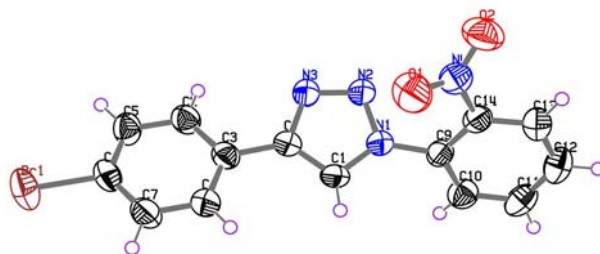

**Figure 4.** The molecular structure of compound **11**

**1-(3-Nitrophenyl)-4-phenyl-1H-1,2,3-triazole (12, P3NPT):** MP: 204-205 °C.  $^1\text{H}$  NMR (200 MHz,  $\text{CDCl}_3$ )  $\delta$  7.40-7.50 (m, 3H), 7.78 (t,  $J = 8.21$  Hz, 1H), 7.91-7.93 (m, 2H), 8.25-8.33 (m, 2H), 8.30 (s, 1H), 8.65 (t,  $J = 2.20$  Hz, 1H).  $^{13}\text{C}$  NMR (50 MHz,  $\text{DMSO-d}_6$ ) 115.0 (d), 120.4 (d), 123.5 (d), 125.8 (d), 126.3 (d), 128.9 (d), 129.5 (d), 130.2 (s), 132.0 (d), 137.5 (s), 148.1 (s), 148.9 (s). Anal. Calcd for  $\text{C}_{14}\text{H}_{10}\text{N}_4\text{O}_2$  : C, 63.15; H, 3.79; N, 21.04; Found: C, 63.06; H, 3.88; N, 20.89.

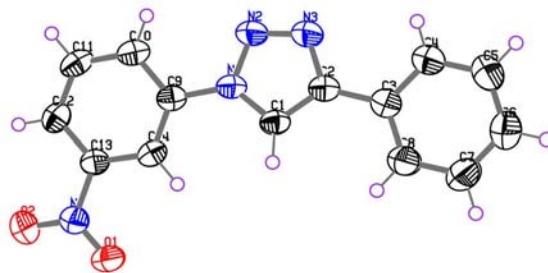

**Figure 5.** The molecular structure of compound **12**

**4-(2-Bromophenyl)-1-(3-nitrophenyl)-1H-1,2,3-triazole (13, 2BP3NPT):** MP: 131-132 °C.  $^1\text{H}$  (400 MHz,  $\text{CDCl}_3$ )  $\delta$  7.25 (ddd,  $J = 1.8, 7.4, 9.2$  Hz, 1H), 7.46 (dt,  $J = 1.3, 7.8$  Hz, 1H), 7.69 (dd,  $J = 1.1, 8.1$  Hz, 1H), 7.78 (t,  $J = 8.2$  Hz, 1H), 8.20 (dd,  $J = 1.8, 7.8$  Hz, 1H), 8.27 (ddd,  $J = 1.0, 2.1, 8.2$  Hz, 1H), 8.33 (ddd,  $J = 1.0, 2.1, 8.2$  Hz, 1H), 8.66 (t,  $J = 2.1$  Hz, 1H), 8.79 (s, 1H).  $^{13}\text{C}$  (100 MHz,  $\text{CDCl}_3$ ) 115.3 (d), 120.6 (d), 121.3 (s), 123.2 (d), 126.0 (d), 127.9 (d), 129.9(d), 130.4 (s), 130.8 (d), 131.0 (d), 133.7 (d), 137.8 (s), 146.6 (s), 149.1 (s). Anal. Calcd for  $\text{C}_{14}\text{H}_9\text{BrN}_4\text{O}_2$  : C, 48.72; H, 2.63; Br, 23.15; N, 16.23; Found: C, 49.00; H, 2.81; Br, 23.42; N, 16.11.

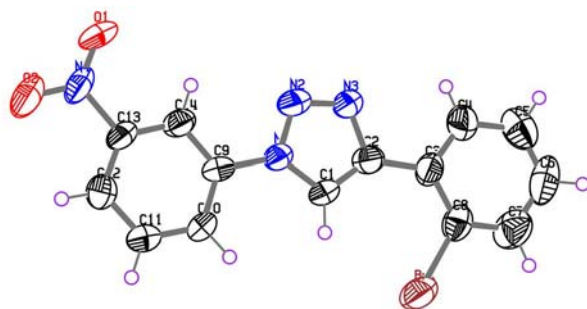

**Figure 6.** The molecular structure of compound 13

**4-(3-Bromophenyl)-1-(3-nitrophenyl)-1H-1,2,3-triazole (14, 3BP3NPT):** MP: 195-196 °C.  $^1\text{H}$  (400 MHz, DMSO- $\text{D}_6$ )  $\delta$  7.37-7.54 (m, 2H), 7.84-7.99 (m, 2H), 8.14 (t,  $J$  = 1.6 Hz, 1H), 8.32 (dd,  $J$  = 1.6, 8.3 Hz, 1H), 8.46 (dd,  $J$  = 1.6, 8.3 Hz, 1H), 8.86 (t,  $J$  = 2.0 Hz, 1H), 9.58 (s, 1H).  $^{13}\text{C}$  (100 MHz, DMSO- $\text{D}_6$ ) 112.7 (d), 118.5 (d), 120.7 (s), 121.1 (d), 122.4 (d), 123.8 (d), 126.4 (d), 129.1 (d), 129.2 (d), 129.6 (d), 130.6 (s), 135.6 (s), 144.8 (s), 146.9 (s). Anal. Calcd for  $\text{C}_{14}\text{H}_9\text{BrN}_4\text{O}_2$  : C, 48.72; H, 2.63; Br, 23.15; N, 16.23; Found: C, 48.91; H, 2.83; Br, 23.09; N, 16.06.

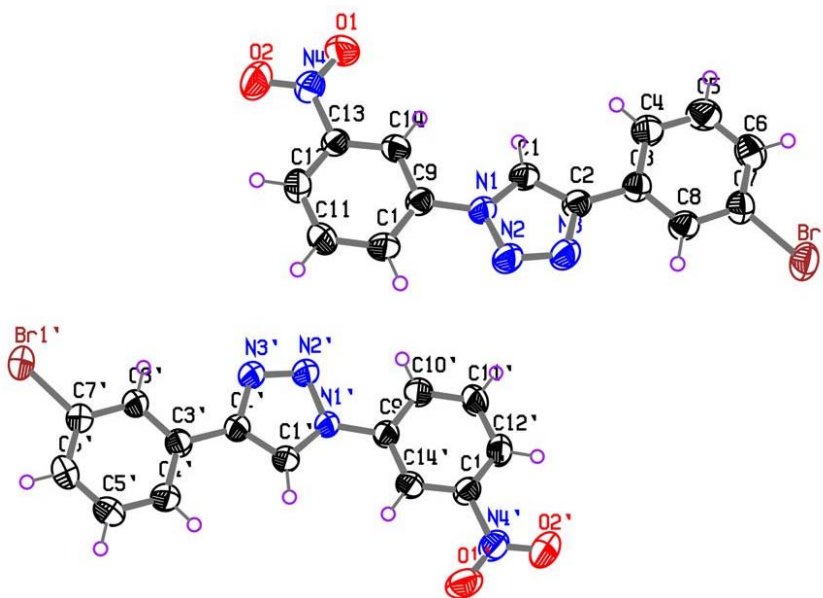

**Figure 7.** The molecular structure of compound 14

**4-(4-Bromophenyl)-1-(3-nitrophenyl)-1H-1,2,3-triazole (15, 4BP3NPT):** MP: 230-231 °C.  $^1\text{H}$  (400 MHz, DMSO- $\text{D}_6$ )  $\delta$  7.46 (br. s, 1H), 7.50 (br. s, 1H), 7.71-7.78 (m, 3H), 8.18 (dd,  $J$  = 2.1, 8.1 Hz, 1H), 8.30 (dd,  $J$  = 2.5, 8.2 Hz, 1H), 8.68 (t,  $J$  = 2.1 Hz, 1H), 9.35 (s,

<sup>1</sup>H). <sup>13</sup>C (100 MHz, DMSO-D<sub>6</sub>) 112.8 (d), 118.2 (d), 120.0 (s), 121.2 (d), 123.9 (d), 125.1 (d), 125.6 (d), 127.5 (s), 127.7 (d), 129.7 (d), 130.1 (d), 135.7 (s), 145.3 (s), 146.9 (s). Anal. Calcd for C<sub>14</sub>H<sub>9</sub>BrN<sub>4</sub>O<sub>2</sub> : C, 48.72; H, 2.63; Br, 23.15; N, 16.23; Found: C, 48.75; H, 2.81; Br, 23.23; N, 16.30.

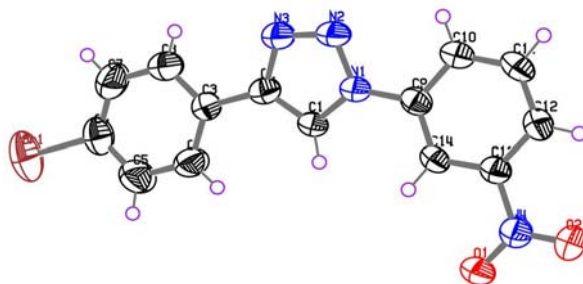

**Figure 8.** *The molecular structure of compound 15*

**1-(4-Nitrophenyl)-4-phenyl-1H-1,2,3-triazole (16, P4NPT):** MP: 236-238 °C (d). <sup>1</sup>H NMR (200 MHz, CDCl<sub>3</sub>) δ 7.41-7.56 (m, 3H), 7.93-7.98 (m, 2H), 8.23-8.28 (m, 2H), 8.47-8.51 (m, 2H), 9.48 (s, 1H). <sup>13</sup>C NMR (125 MHz, DMSO-D<sub>6</sub>) 120.0 (d), 120.6 (d), 125.5 (d), 125.7 (d), 128.7 (d), 129.2 (d), 129.8 (s), 140.9 (s), 146.8 (s), 147.9 (s). Anal. Calcd for C<sub>14</sub>H<sub>10</sub>N<sub>4</sub>O<sub>2</sub> : C, 63.15; H, 3.79; N, 21.04; O, 12.02; Found: C, 63.31; H, 3.53; N, 20.91.

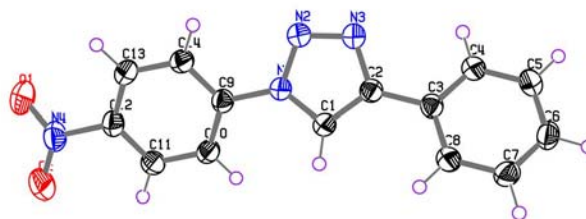

**Figure 9.** *The molecular structure of compound 16*

**4-(2-Bromophenyl)-1-(4-nitrophenyl)-1H-1,2,3-triazole (17, 2BP4NPT):** MP: 170-171 °C. <sup>1</sup>H (400 MHz, CDCl<sub>3</sub>) 7.26 (ddd, *J* = 1.8, 7.4, 9.2 Hz, 1H), 7.47 (dt, *J* = 1.2, 7.8 Hz, 1H), 7.69 (dd, *J* = 1.2, 7.9 Hz, 1H), 8.04 (t, *J* = 2.6 Hz, 1H), 8.09 (t, *J* = 2.6 Hz, 1H), 8.2 (dd, *J* = 1.6, 7.8 Hz, 1H), 8.42 (t, *J* = 2.6 Hz, 1H), 8.47 (t, *J* = 2.6 Hz, 1H), 8.79 (s,

$^1\text{H}$ .  $^{13}\text{C}$  (100 MHz,  $\text{CDCl}_3$ ) 120.5 (d), 121.3 (s), 124.1 (d), 124.9 (d), 125.6 (d), 127.9 (d), 130.0 (d), 130.2 (d), 130.8 (d), 131.9 (s), 133.8 (d), 141.1 (s), 146.7 (s), 147.3 (s). Anal. Calcd for  $\text{C}_{14}\text{H}_9\text{BrN}_4\text{O}_2$ : C, 48.72; H, 2.63; Br, 23.15; N, 16.23; Found: C, 48.57; H, 2.90; Br, 22.89; N, 16.12.

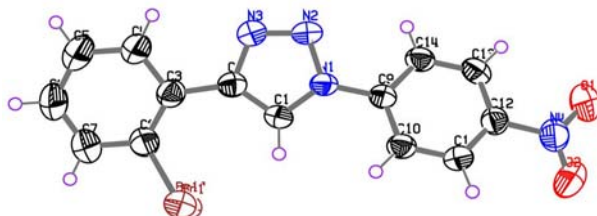

**Figure 10.** The molecular structure of compound **17**

**4-(3-Bromophenyl)-1-(4-nitrophenyl)-1H-1,2,3-triazole (18, 3BP4NPT):** MP: 217-218 °C.  $^1\text{H}$  (400 MHz,  $\text{DMSO}-d_6$ ) 7.36-7.54 (m, 2H), 7.96 (dt,  $J = 1.8, 7.6$  Hz, 1H), 8.14 (t,  $J = 1.6$  Hz, 1H), 8.26, 8.31, 8.45, 8.51 (4br. m, 4H), 9.47 (s, 1H).  $^{13}\text{C}$  (100 MHz,  $\text{DMSO}-d_6$ ) 118.6 (d), 120.8 (d), 122.6 (s), 123.8 (d), 124.1 (d), 126.5 (d), 127.4 (d), 129.1 (d), 129.4 (d), 130.5 (s), 139.3 (s), 145.0 (s), 145.1 (s). Anal. Calcd for  $\text{C}_{14}\text{H}_9\text{BrN}_4\text{O}_2$ : C, 48.72; H, 2.63; Br, 23.15; N, 16.23; Found: C, 48.63; H, 2.88; Br, 23.29; N, 16.48.

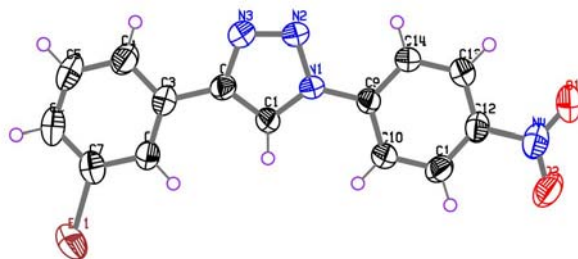

**Figure 11.** The molecular structure of compound **18**

**4-(4-Bromophenyl)-1-(4-nitrophenyl)-1H-1,2,3-triazole (19, 4BP4NPT):** MP: 149-150 °C.  $^1\text{H}$  (400 MHz,  $\text{DMSO}-d_6$ ) 7.59 (t,  $J = 2.2$  Hz, 1H), 7.64 (t,  $J = 2.2$  Hz, 1H), 7.77 (t,  $J = 2.2$  Hz, 1H), 7.82 (t,  $J = 2.2$  Hz, 1H), 8.01 (t,  $J = 2.2$  Hz, 1H), 8.06 (t,  $J = 2.2$  Hz, 1H), 8.28 (t,  $J = 2.2$  Hz, 1H), 8.44 (t,  $J = 2.2$  Hz, 1H), 8.48 (t,  $J = 2.2$  Hz, 1H).  $^{13}\text{C}$  (100 MHz,  $\text{DMSO}-d_6$ ) 118.2 (d), 118.5 (d), 119.9 (s), 123.7 (d), 125.5 (d), 127.3 (s), 130.1



(d), 139.1 (s), 144.9 (s), 145.2 (s). Anal. Calcd for  $C_{14}H_9BrN_4O_2$ : C, 48.72; H, 2.63; Br, 23.15; N, 16.23; Found: C, 48.70; H, 2.40; Br, 23.43; N, 16.01.

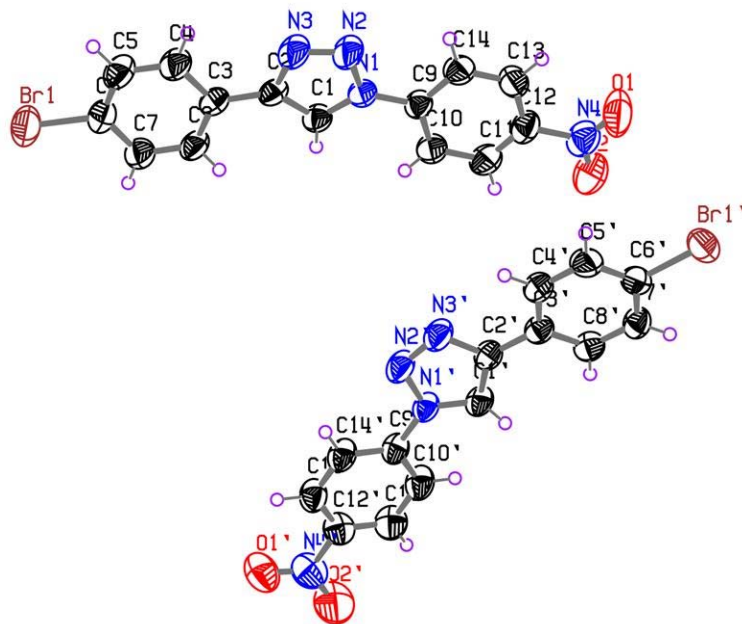

**Figure 12.** *The molecular structure of compound 19*
